# Supplementary material
Source: ML conference proceedings conference paper supplement (https://openaccess.thecvf.com/content/ICCV2021/html/Tang_Towards_Accurate_Alignment_ICCV_2021_paper.html)
Supplement: Supplementary file 1 [file Tang_Towards_Accurate_Alignment_ICCV_2021_supplemental.zip]

Archive with 2 entries (2 files):
- supp.pdf
- video_3646_compressed.mp4
